# Supplementary material for: Fast manipulation of cellular cAMP level by light in vivo
Source: Springer Nature journal article supplement (doi:10.1038/nmeth975), 2006-11-26
Supplement: nmeth975-S1.pdf [file nmeth975-S1.pdf]

**Supplementary Figure 1**

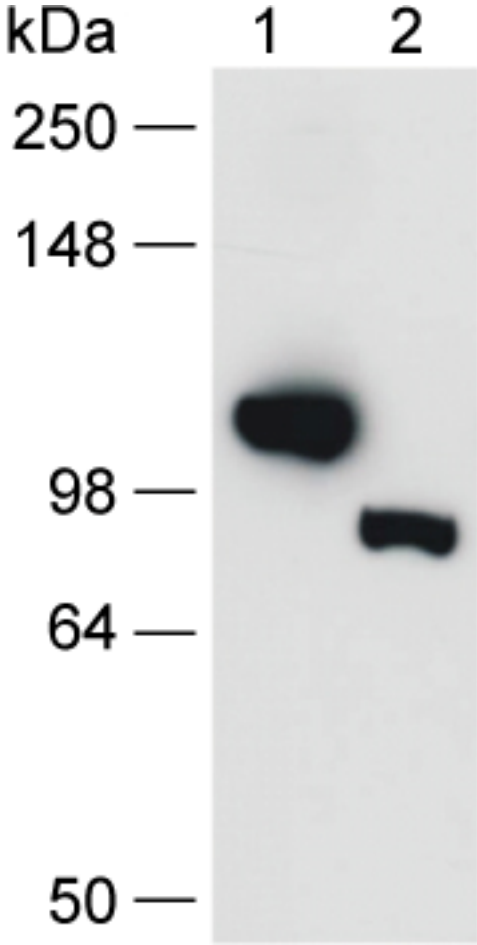

**Detection of PAC $\alpha$  and PAC $\beta$  in oocytes.**

Western blot of proteins from oocytes, injected with 20 ng cRNA coding for c-myc-tagged PAC $\alpha$  or PAC $\beta$ . Protein was detected with a mouse monoclonal antibody against c-myc. Protein corresponding to roughly one oocyte was loaded per lane.
